# Supplementary material for: Fe3O4–Au–polydopamine hybrid microcapsules with photothermal–photodynamic synergistic anti-bacterial performance
Source: Royal Society of Chemistry journal article supplement (doi:10.1039/d1ce00926e), 2021-01-01
Supplement: d1ce00926e1.pdf [file d1ce00926e1.pdf]

## SUPPORTING INFORMATION

### **Fe<sub>3</sub>O<sub>4</sub>-Au-Polydopamine Hybrid Nanocapsules for Photothermal-Photodynamic Synergistic Anti-bacterial Performance**

*Qunling Fang<sup>a,\*</sup>, Kezhu Xu<sup>a</sup>, Qingshan Xiong<sup>a</sup>, Yunqi Xu<sup>b</sup>, Ailing Hui<sup>a</sup>, Shouhu  
Xuan<sup>b,\*</sup>*

<sup>a</sup> School of Food and Biological Engineering, Key Laboratory of Metabolism and Regulation for Major Diseases of Anhui Higher Education Institutes, Hefei University of Technology, Hefei, 230009, PR China

<sup>b</sup> CAS Key Laboratory of Mechanical Behavior and Design of Materials, Department of Modern Mechanics, University of Science and Technology of China, Hefei 230027, PR China

\*Corresponding author:

Asso. Prof. Qunling Fang

E-mail: [fql.good@hfut.edu.cn](mailto:fql.good@hfut.edu.cn)

Tel: 86-551-62904353

Fax: 86-551-62904353

Prof. Shouhu Xuan

E-mail: [xuansh@ustc.edu.cn](mailto:xuansh@ustc.edu.cn)

Tel: 86-551-63601702

Fax: 86-551-63606382

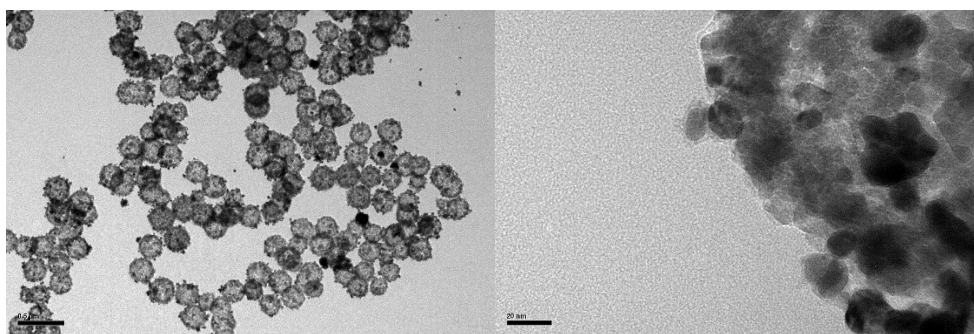

**Figure SI1.** TEM image of the  $\text{Fe}_3\text{O}_4$ -Au-PDA hybrid microcapsules with different magnifications.

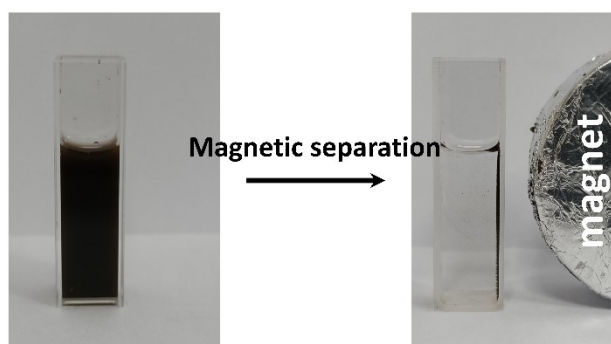

**Figure SI2.** Magnetic separation process of the suspension with  $\text{Fe}_3\text{O}_4$ -Au-PDA hybrid microcapsule in water.

**Table SI1.** The weight percentage of the Au and Fe elements in the  $\text{Fe}_3\text{O}_4$  hollow microspheres,  $\text{Fe}_3\text{O}_4$ @Au/PDA core/shell microspheres, and  $\text{Fe}_3\text{O}_4$ -Au-PDA hybrid microcapsules.

|                                                        | Au (wt%) | Fe (wt%) |
|--------------------------------------------------------|----------|----------|
| $\text{Fe}_3\text{O}_4$                                |          | 68.778   |
| $\text{Fe}_3\text{O}_4$ @Au/PDA core shell microsphere | 14.8     | 43.62    |
| $\text{Fe}_3\text{O}_4$ -Au-PDA hybrid microcapsule    | 16.35    | 38.81    |
